# Supplementary material for: Cobalt oxide and N-doped carbon nanosheets derived from a single two-dimensional metal–organic framework precursor and their application in flexible asymmetric supercapacitors
Source: Royal Society of Chemistry journal article supplement (doi:10.1039/c6nh00224b), 2017-01-01
Supplement: c6nh00224b1.pdf [file c6nh00224b1.pdf]

## Electronic Supplementary Information

### **Cobalt Oxide and N-doped Carbon Nanosheets Derived from a Single Two-Dimensional Metal–Organic Framework Precursor and their Application in Flexible Asymmetric Supercapacitors**

*Cao Guan<sup>1</sup>, Wei Zhao<sup>2</sup>, Yating Hu<sup>1</sup>, Zhuangchai Lai<sup>2</sup>, Xin Li<sup>1</sup>, Shijing Sun<sup>3</sup>, Hua Zhang<sup>2</sup>, Anthony K. Cheetham<sup>1, 3</sup>, and John Wang<sup>1</sup>*

[1] Department of Materials Science and Engineering, National University of Singapore,  
117574 Singapore

E-mail: [msegc@nus.edu.sg](mailto:msegc@nus.edu.sg); [msewangj@nus.edu.sg](mailto:msewangj@nus.edu.sg)

[2] School of Materials Science and Engineering, Nanyang Technological University,  
Singapore 639798

[3] Department of Materials Science and Metallurgy, University of Cambridge,  
Cambridge, CB2 3QZ, UK.

E-mail: [akc30@cam.ac.uk](mailto:akc30@cam.ac.uk)

## Experimental

### Material synthesis:

Preparation of 2D MOF on carbon cloth: an aqueous solution contains MIM (40 mL, 0.4 M) was quickly added into the aqueous solution of  $\text{Co}(\text{NO}_3)_2 \cdot 6\text{H}_2\text{O}$  (40 mL, 50 mM), then a piece of clean CC substrate ( $2 \times 5 \times 0.036 \text{ cm}^3$ , the upper side and back side protected with by polytetrafluoroethylene tape) was immersed into the mixture for 1 h. The CC was then taken out, cleaned with deionized water and vacuum dried overnight.

Preparation of  $\text{CC@Co}_3\text{O}_4$ : The  $\text{CC@Co-MOF}$  was firstly annealed in  $\text{N}_2$  atmosphere at  $500^\circ\text{C}$  for 1 h with a ramp rate of  $1^\circ\text{C min}^{-1}$ , the temperature was then dropped to  $350^\circ\text{C}$  at  $5^\circ\text{C min}^{-1}$ , after which the samples were further annealed in air at  $350^\circ\text{C}$  for 2 h. The mass loading of  $\text{Co}_3\text{O}_4$  is  $\sim 0.25 \text{ mg cm}^{-2}$ .

Preparation of  $\text{CC@NC}$ : The  $\text{CC@Co-MOF}$  was firstly annealed in  $\text{N}_2$  atmosphere at  $800^\circ\text{C}$  for 5 h with a ramp rate of  $1^\circ\text{C min}^{-1}$ , the samples were then immersed in 1 M  $\text{FeCl}_3$  solution for 6 h. After wash with deionized water, the samples were dried at  $60^\circ\text{C}$  for 24 h. The mass loading of NC is  $\sim 0.4 \text{ mg cm}^{-2}$ .

### Characterization:

Samples were characterized using Scanning Electron Microscopy (SEM, Zeiss, 2.0-20.0 kV), Transmission Electron Microscopy (TEM, JEOL-2100F), X-Ray Diffraction (XRD, Bruker D8 diffractometer), Raman scattering spectra (LABRAM-HR Raman spectrometer, excited with 514.5 nm Arp laser), and X-ray Photoelectron Spectroscopy (XPS, AXIS Ultra). The mass of electrode materials was also recorded by an AX/MX/UMX Balance (METTLER TOLEDO, maximum=5.1 g; delta= 0.001 mg).

### Electrochemical measurement:

Electrochemical measurements were conducted using Solartron 1470E at room temperature. For three-electrode system tests,  $\text{CC@Co}_3\text{O}_4$  or  $\text{CC@NC}$  was directly used as the working electrode without any metal support or other current collector. A Pt plate and a  $\text{Hg/HgO}$  were used as the counter electrode and the reference electrode, respectively. KOH (2M) was used as the electrolyte. The polymer electrolyte was obtained by dissolving PVA (6 g) into  $\text{H}_2\text{O}$  (40 mL) at  $85^\circ\text{C}$  and then mixed with KOH (20 mL, 6 M) solution. To assemble the solid-state device, the two electrodes were immersed into the gel electrolyte and left under ambient condition to remove the unnecessary water before being assembled face-to-face. The polymer electrolyte serves as both the electrolyte and the separator. After the electrolyte was solidified, a flexible quasi-solid-state device can be attained. The capacity of the electrode was calculated by  $C = I\Delta t / A\Delta V$ , where  $I$  is the discharge current,  $\Delta t$  is the discharge time, and  $A$  is active materials' mass or electrode area,  $\Delta V$  is the voltage drop upon discharge. The energy density ( $E$ ) and power density ( $P$ ) of the full cell were calculated by:  $E = \int V(t) dt / B$ ,  $P = E / \Delta t$ , where  $I$  is the discharge current,  $V(t)$  is the discharge voltage at  $t$ ,  $dt$  is time differential and  $B$  is the total mass of active materials or the whole electrodes' mass. EIS measurements were conducted by applying an AC voltage with 5 mV amplitude in a frequency range from 0.1 Hz to 100 kHz at open circuit potential, and the results were fitted using Z-view software (detailed process is: open the data, using Instant Fit, choose and set parameters for Equivalent Circuits, then Run Simulation).

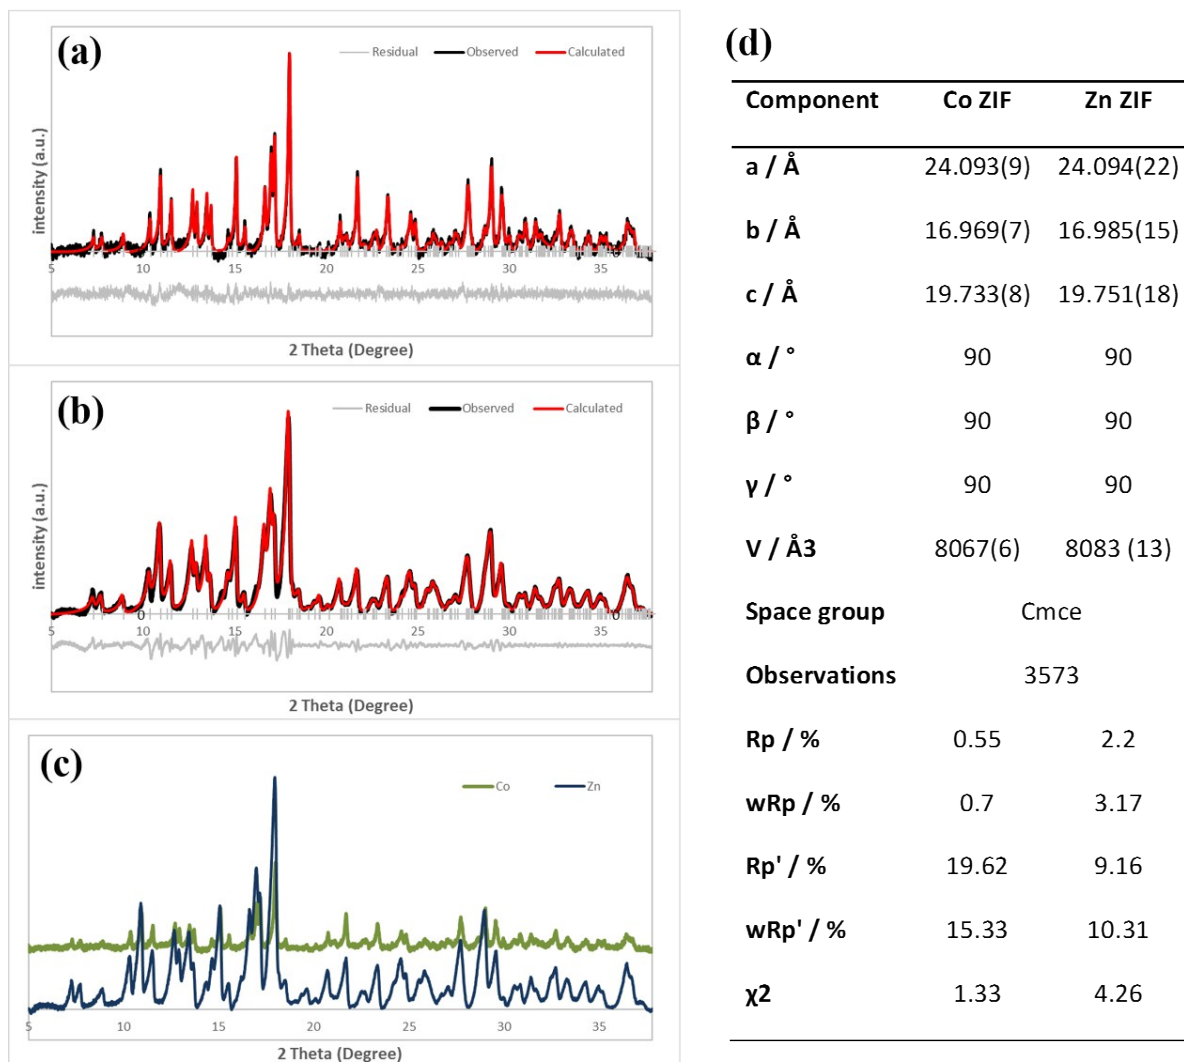

**Fig. S1.** (a) Pawley refinement of Co-MOF (background removed). (b) Pawley refinement of Zn-MOF (background removed). (c) XRD patterns of prepared Co-MOF and Zn-MOF, confirming the same crystal structure. (d) Table of Pawley Refinement Details.

Data collected from X-ray powder diffraction was analysed using Pawley refinement in Topas program. The large background was manually removed and the prepared Co-MOF was confirmed to have the same crystal structure as the prepared Zn-MOF (space group of Cmce). The lattice parameters of the Co-MOF was determined with  $a = 24.093(9) \text{ \AA}$ ,  $b = 16.969(7) \text{ \AA}$  and  $c = 19.733(8) \text{ \AA}$ . The unit cell is slightly smaller than the Zn-MOF.

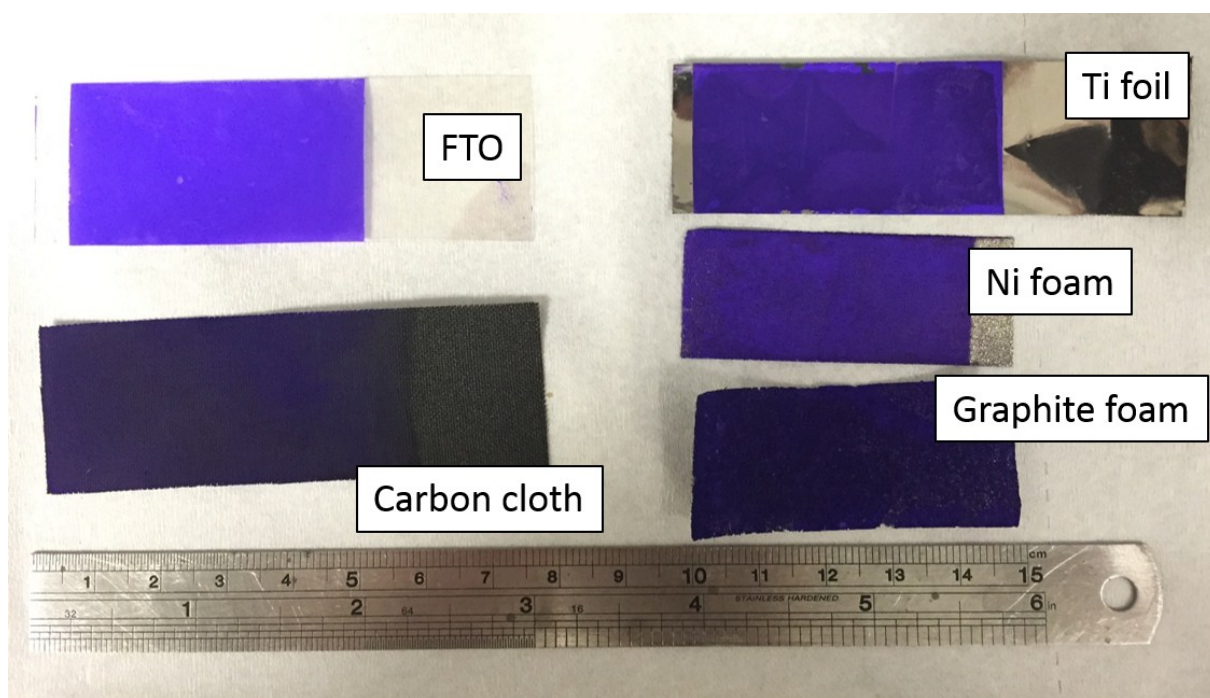

**Fig. S2.** Digital image of 2D MOF grown directly on different flexible conductive substrates.

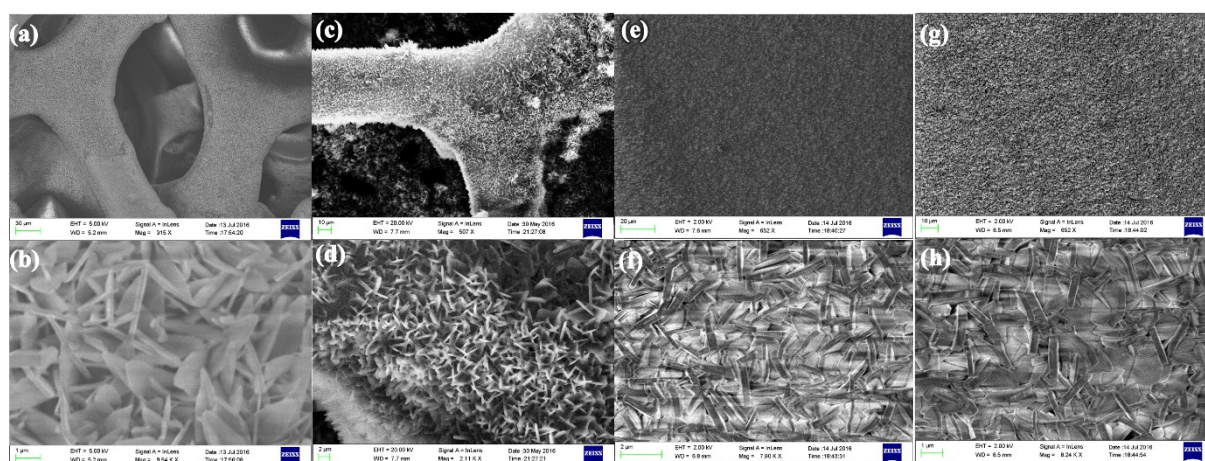

**Fig. S3.** SEM images of 2D MOF grown on (a, b) nickel foam, (c, d) graphite foam, (e, f) FTO, (g, h) Ti foil.

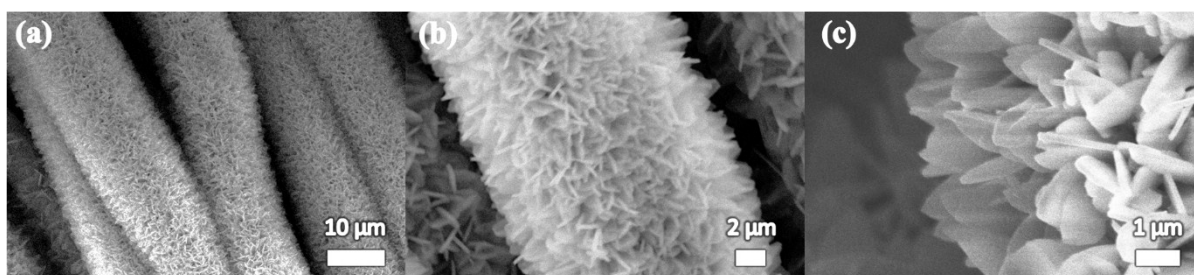

**Fig. S4.** SEM images of 2D MOF grown on carbon cloth.

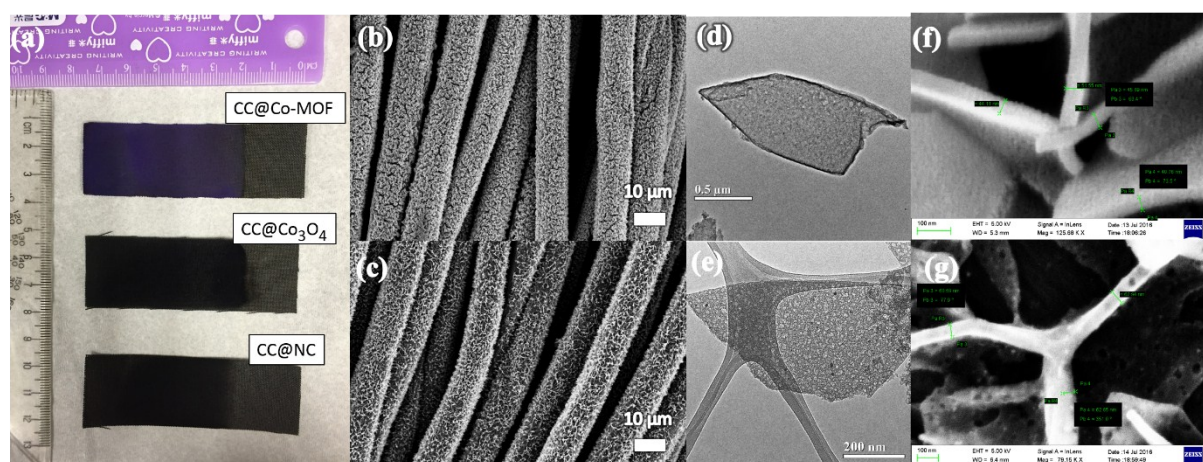

**Fig. S5.** (a) Images of 2D MOF and the thus derived electrodes ( $\text{Co}_3\text{O}_4$  and N-doped carbon) grown directly on carbon cloth. (b) Large scale SEM image of  $\text{CC@Co}_3\text{O}_4$ . (c) Large scale SEM image of  $\text{CC@NC}$ . (d) Typical TEM image of a 2D  $\text{Co}_3\text{O}_4$  nanosheet. (e) Typical TEM image of a 2D NC nanosheet. (f) Top view of 2D  $\text{Co}_3\text{O}_4$  nanosheets. (g) Top view of 2D NC nanosheets.

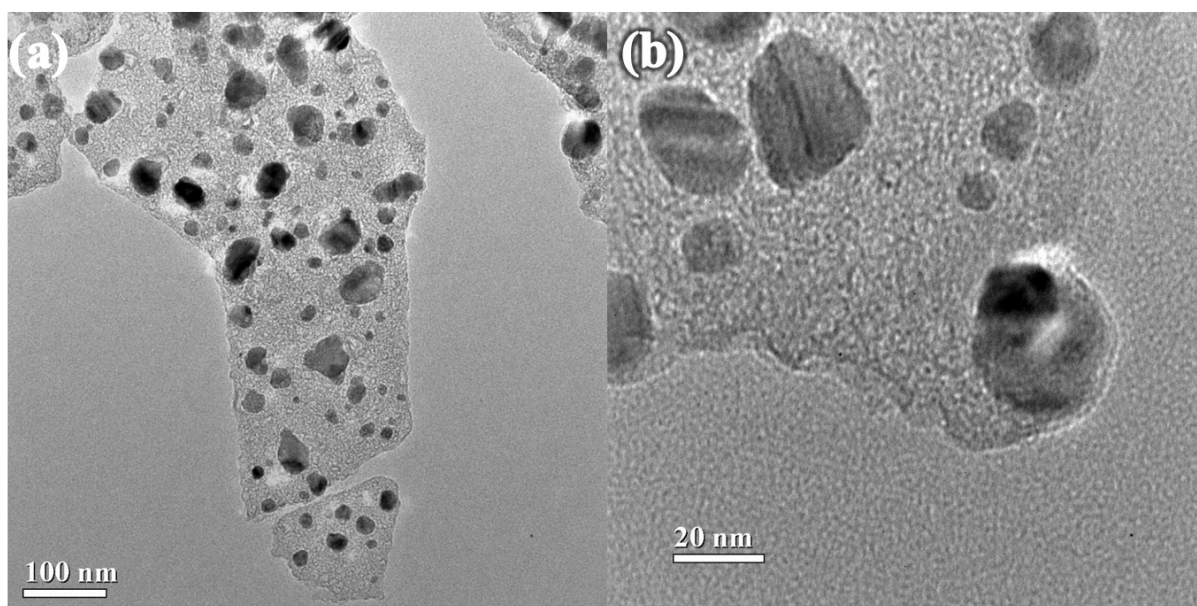

**Fig. S6.** SEM image of 2D MOF after annealing in  $N_2$  at 800 °C without  $FeCl_3$  etching.

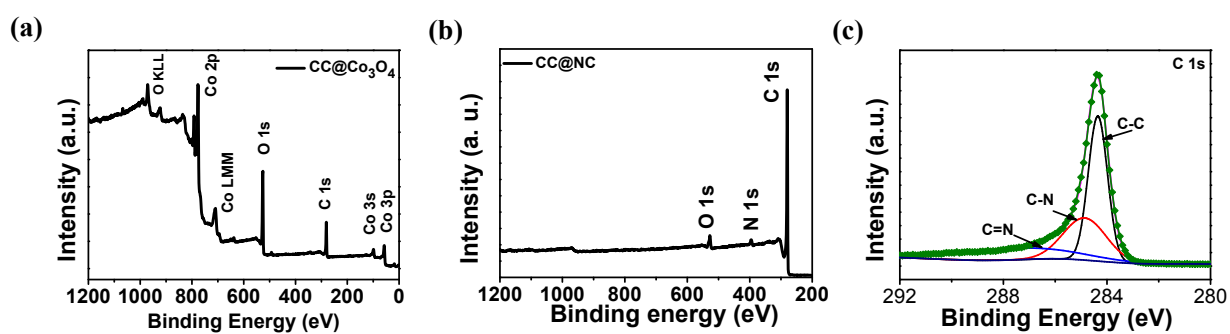

**Fig. S7.** Wide survey XPS spectra of (a)  $CC@Co_3O_4$  and (b)  $CC@NC$ . (C) C 1s spectra in  $CC@NC$ .

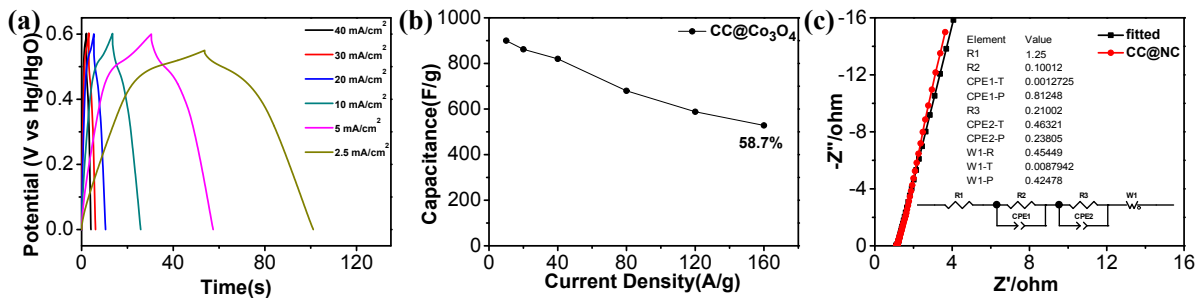

**Fig. S8.** (a) Charge-discharge curves, (b) rate property, and (c) EIS results of CC@Co<sub>3</sub>O<sub>4</sub> and (b) CC@NC.

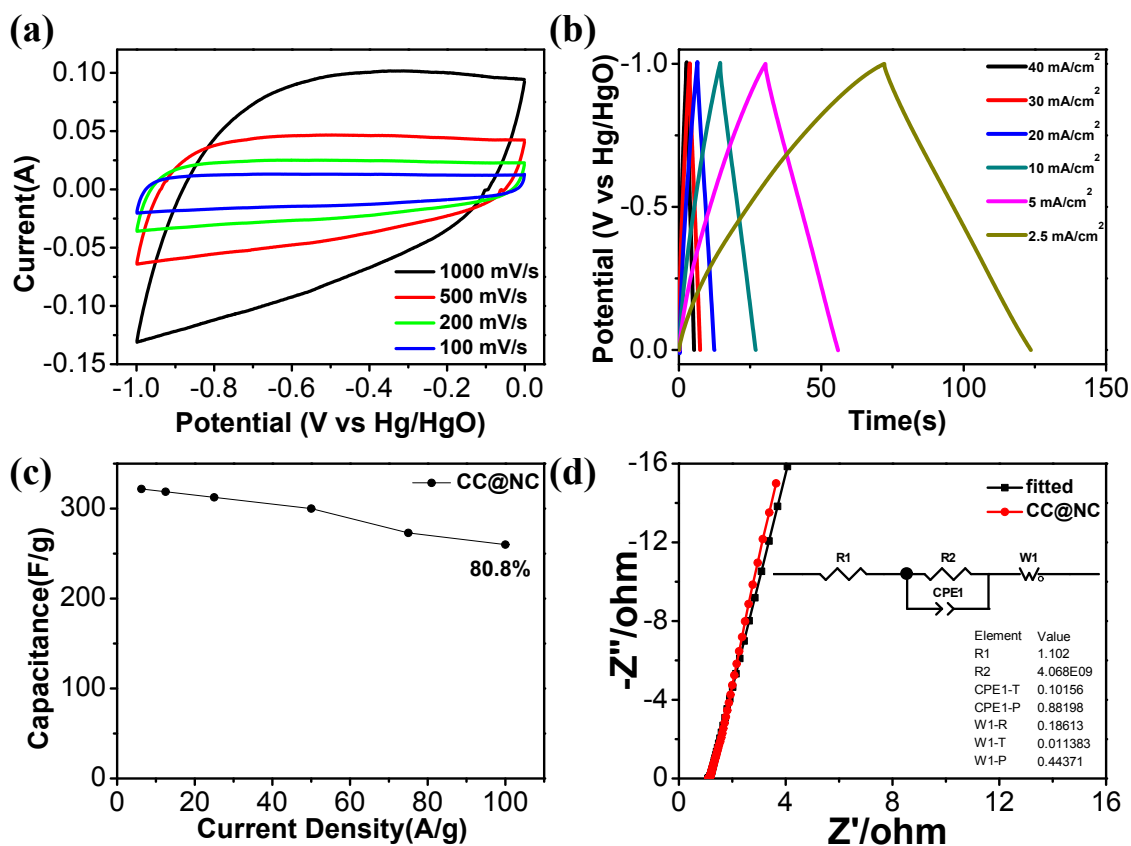

**Fig. S9.** (a) CV curves at high scan rates, (b) charge-discharge curves, (c) rate property, and (d) EIS results of CC@NC.
